# Supplementary material
Source: publisher figshare collection journal article supplement (https://sage.figshare.com/ndownloader/files/17619167)
Supplement: Supplementary file 1 [file 17619167]

**Supplemental Materials**

| **List1** | **List2** |
| --- | --- |
| reptile | harness |
| shotgun | nectar |
| painter | costume |
| infant | fiord |
| pudding | icebox |
| poster | pepper |
| cowhide | lemon |
| fabric | salad |
| locker | robber |
| piston | bandit |
| hamlet | monarch |
| bullet | glacier |
| saloon | bagpipe |
| butcher | banker |
| hairpin | kettle |
| hostage | beggar |
| singer | invoice |
| rattle | jelly |
| leopard | abode |
| cigar | sunburn |
